# Supplementary material for: C-STABILITY an innovative modeling framework to leverage the continuous representation of organic matter
Source: PubMed Central journal article supplement (PMC7864906; doi:10.1038/s41467-021-21079-6), 2021-02-05
Supplement: 41467_2021_21079_MOESM1_ESM.pdf [file 41467_2021_21079_MOESM1_ESM.pdf]

# C-STABILITY an innovative modeling framework to leverage the continuous representation of organic matter (supplementary information)

Sainte-Marie Julien <sup>\*1,2,3</sup>, Barrandon Matthieu<sup>4</sup>, Saint-André Laurent<sup>2,3</sup>, Gelhaye Eric<sup>3,5</sup>, Martin Francis<sup>3,5</sup>, and Derrien Delphine <sup>†2,3</sup>

<sup>1</sup>Université de Lorraine, AgroParisTech, INRAE, SILVA, F-54000 Nancy, France

<sup>2</sup>INRAE, BEF, F-54000 Nancy, France

<sup>3</sup>Laboratory of Excellence ARBRE, F-54000 Nancy, France

<sup>4</sup>Université de Lorraine, CNRS, IECL, F-54000 Nancy, France

<sup>5</sup>Université de Lorraine, INRAE, IAM, F-54000 Nancy, France

---

\*julien.sainte-marie@agroparistech.fr

†delphine.derrien@inrae.fr

## Supplementary note 1

Table 1: Studies utilized to design the scenarios.

|                 |                                                                                                                        |             |
|-----------------|------------------------------------------------------------------------------------------------------------------------|-------------|
| Scenarios 1 & 2 | Concurrent changes in substrate chemistry and enzymes occurrence/ enzyme efficiency in laboratory litter decomposition | 1,2,3,4,5   |
| Scenario 3      | Classification of decomposers into functional communities                                                              | 6,7,8,9     |
|                 | Successions of decomposer communities during in situ decomposition of plant litter                                     | 10,11,12,13 |
| Scenario 4      | Chemical characterisation of organic biomolecules present in soil organic matter                                       | 14,15,16    |

## Supplementary note 2

### a No-cheating

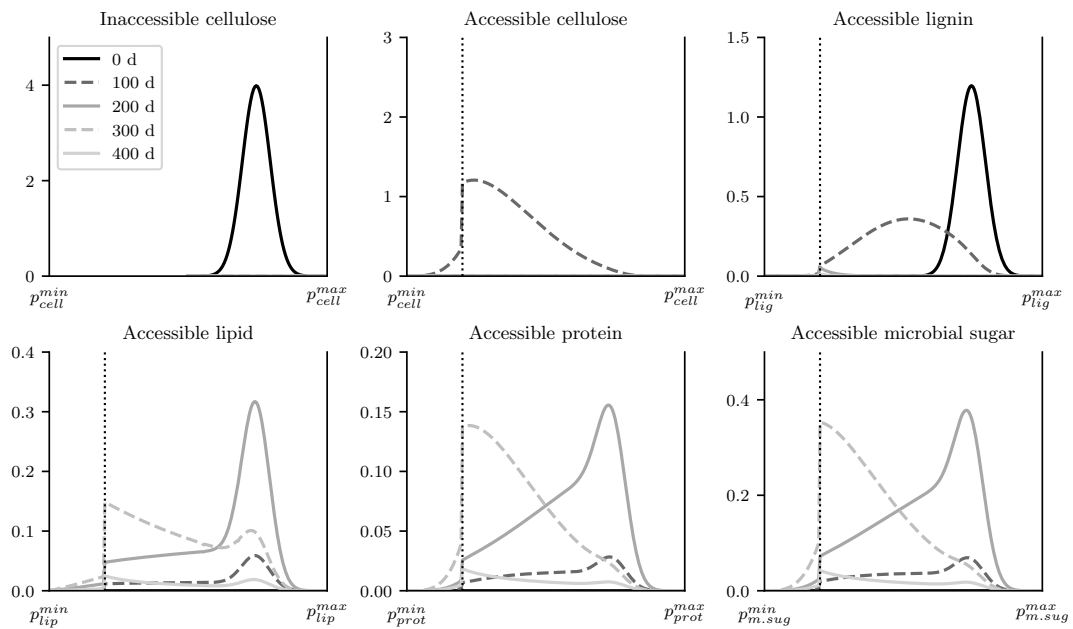

### b Cheating

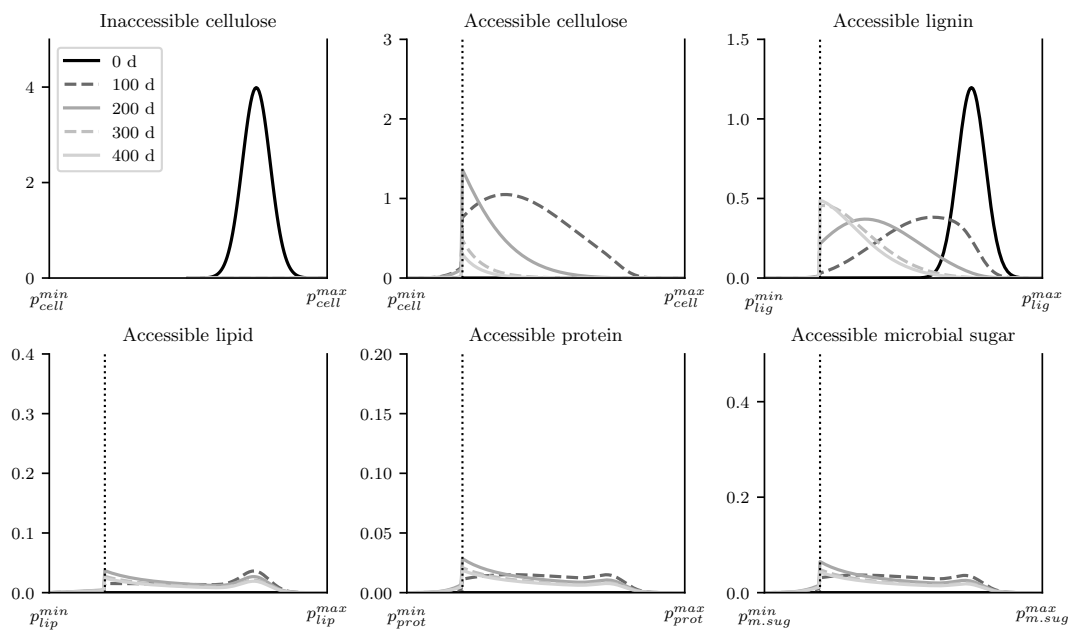

Fig. 1: Temporal variations in polymerization distribution for each substrate pool in scenario 3. A comparison between a no-cheating and b cheating microbial behaviour.

## Supplementary note 3

**Introduction** We give here a proof of steady state equations for scenario 4. We recall the general equations of the system.

$$\begin{aligned}
\frac{\partial \chi_*^{ac}}{\partial t}(p, t) &= \tau_{tr,*}^{ac} \chi_*^{in}(p, t) - \tau_{tr,*}^{in} \chi_*^{ac}(p, t) \\
&\quad - \tau_{enz}^0 \sum_{mic} C_{mic}(t) \chi_*^{ac}(p, t) \\
&\quad + \tau_{enz}^0 \sum_{mic} C_{mic}(t) (\alpha_{enz} + 1) (p - p_*^{min})^{\alpha_{enz}} \int_p^{p_*^{max}} \frac{\chi_*^{ac}(p', t)}{(p' - p_*^{min})^{\alpha_{enz} + 1}} dp' \\
&\quad + \sum_{mic} C_{mic}(t) \left( m_{mic}^0 s_{mic,*}(p) - \mathbb{1}_{\mathcal{D}_u}(p) u_{mic,*}^0 \chi_*^{ac}(p, t) \right) \\
&\quad + i_*^{ac}(p, t), \\
\frac{\partial \chi_*^{in}}{\partial t}(p, t) &= \tau_{tr,*}^{in} \chi_*^{ac}(p, t) - \tau_{tr,*}^{ac} \chi_*^{in}(p, t) + i_*^{in}(p, t).
\end{aligned} \tag{S1}$$

where  $\mathbb{1}_{\mathcal{D}_u}(p)$  equals 1 if  $p \in \mathcal{D}_u$  and 0 otherwise. The dynamics of microbial  $C_{mic}$  is obtained by,

$$\frac{dC_{mic}}{dt}(t) = -m_{mic}^0 C_{mic}(t) + \sum_* u_{mic,*}^0 e_{mic,*}^0 C_{mic}(t) \int_{\mathcal{D}_u} \chi_*^{ac}(p, t) dp. \tag{S3}$$

**Specific assumptions** Due to the specific design of the scenario 4, several terms of the equations can be simplified. First, we consider a single microbial community and all microbial parameters ( $u^0$ ,  $e^0$  and  $m^0$ ) are considered identical for all biochemical classes. Second, we consider that all the substrate is accessible i.e.  $\chi_*^{in} = 0$  and  $\tau_{tr,*}^{ac} = \tau_{tr,*}^{in} = i_*^{in} = 0$ . Then all distinction between accessible and inaccessible substrate were removed in the following. Third, we consider that input terms  $i_*^{ac}(p, t) = i_*^{ac}(p)$  are constant over time. To improve readability of the proof, we note without ambiguity  $\alpha_{enz} = \alpha_*$  and  $\tau_{enz}^0 = \tau_*^0$  in the following. Then, for all biochemical classes  $*$ , we have for all  $p \in [p_*^{min}, p_*^{max}]$ ,

$$\begin{aligned}
\frac{\partial \chi_*}{\partial t}(p, t) &= -\tau_*^0 C_{mic}(t) \chi_*(p, t) \\
&\quad + \tau_*^0 C_{mic}(t) (\alpha_* + 1) (p - p_*^{min})^{\alpha_*} \int_p^{p_*^{max}} \frac{\chi_*(p', t)}{(p' - p_*^{min})^{\alpha_* + 1}} dp' \\
&\quad + C_{mic}(t) \left( m_*^0 s_*(p) - \mathbb{1}_{\mathcal{D}_u}(p) u_*^0 \chi_*(p, t) \right) \\
&\quad + i_*(p),
\end{aligned} \tag{S4}$$

$$\frac{dC_{mic}}{dt}(t) = -m_*^0 C_{mic}(t) + u_*^0 e_*^0 C_{mic}(t) \int_{\mathcal{D}_u} \chi_*(p, t) dp. \tag{S5}$$

**Integral operators** We introduce  $p_*^u \in [p_*^{min}, p_*^{max}]$  such that  $\mathcal{D}_u = [p_*^{min}, p_*^u]$  and we define the operators  $A_*$  for a function  $f : ]a, p_*^{max}] \rightarrow \mathbb{R}$  with  $p_*^{min} \leq a$ ,

$$A_* f(p) = (\alpha_* + 1) (p - p_*^{min})^{\alpha_*} \int_p^{p_*^{max}} \frac{f(p')}{(p' - p_*^{min})^{\alpha_* + 1}} dp', \tag{S6}$$

and  $A_*^u$  for a function  $f : ]a', p_*^u] \rightarrow \mathbb{R}$  with  $p_*^{min} \leq a'$ ,

$$A_*^u f(p) = (\alpha_* + 1) (p - p_*^{min})^{\alpha_*} \int_p^{p_*^u} \frac{f(p')}{(p' - p_*^{min})^{\alpha_* + 1}} dp'. \tag{S7}$$

**Steady-state equations** If we set  $\frac{\partial \chi_*(p, t)}{\partial t} = 0$  and  $\frac{dC_{mic}}{dt}(t) = 0$ , we obtain the following equations to solve to obtain  $\chi_*(p)$  and  $C_{mic}$  steady state expressions for all  $p \in [p_*^{min}, p_*^{max}]$ ,

$$\frac{I_*(p)}{C_{mic}} = \tau_*^0 (\chi_*(p) - A_* \chi_*(p)) + \mathbb{1}_{\mathcal{D}_u}(p) u^0 \chi_*(p) - m^0 s_*(p), \quad (S8)$$

$$\frac{m^0}{e^0} = u^0 \sum_* \int_{p_*^{min}}^{p_*^u} \chi_*(p) dp. \quad (S9)$$

**Determination of  $C_{mic}$**  We consider the integration over  $p \in [p_*^{min}, p_*^{max}]$  of equation S8 which gives,

$$\frac{I_*}{C_{mic}} = \tau_*^0 \int_{p_*^{min}}^{p_*^{max}} (\chi_*(p) - A_* \chi_*(p)) dp + u^0 \int_{p_*^{min}}^{p_*^u} \chi_*(p) dp - m^0 S_*.$$

We can verify that  $\int_{p_*^{min}}^{p_*^{max}} (\chi_*(p) - A_* \chi_*(p)) dp = 0$  and if we sum over the biochemical classes  $*$ ,

$$\frac{I}{C_{mic}} = u^0 \sum_* \int_{p_*^{min}}^{p_*^u} \chi_*(p) dp - m^0.$$

According to equation S9,

$$C_{mic} = \frac{I e^0}{m^0 (1 - e^0)}. \quad (S10)$$

**Determination of  $\chi_*$**  We define  $\theta_*(p) = m^0 s_*(p) + \frac{I_*(p)}{C_{mic}}$  and then, we can reformulate equation S8,

$$A_* \chi_*(p) - \chi_*(p) = -\frac{\theta_*(p)}{\tau_*^0}, \quad \text{for all } p \in ]p_*^u, p_*^{max}] \quad (S11)$$

$$A_* \chi_*(p) - \frac{\tau_*^0 + u^0}{\tau_*^0} \chi_*(p) = -\frac{\theta_*(p)}{\tau_*^0}, \quad \text{for all } p \in [p_*^{min}, p_*^u] \quad (S12)$$

To solve these equations, we study integral operators  $A_*$  and  $A_*^u$  and due to their formalism analogies, we only consider  $A$ . We verify that  $A_* f$  satisfy the equation,

$$(A_* f)'(p) = \frac{\alpha_*}{p - p_*^{min}} A_* f(p) - \frac{\alpha_* + 1}{p - p_*^{min}} f(p),$$

Let be  $\lambda \in \mathbb{R}$  and  $F : ]a, p_*^{max}] \rightarrow \mathbb{R}$ , we consider the equation to solve,

$$A_* f - \lambda f = F,$$

and by assuming that  $F$  can be differentiated, we obtain,

$$\frac{\alpha_*}{p - p_*^{min}} A_* f(p) - \frac{\alpha_* + 1}{p - p_*^{min}} f(p) - \lambda f'(p) = F'(p).$$

As  $A_* f = \lambda f + F$ , we obtain,

$$\frac{\lambda \alpha_* - (\alpha_* + 1)}{p - p_*^{min}} f(p) - \lambda f'(p) = F'(p) + \frac{\alpha_*}{p - p_*^{min}} F(p),$$

By defining  $\delta_* = \frac{\alpha_* + 1 - \lambda \alpha_*}{\lambda}$ , we obtain,

$$f'(p) + \frac{\delta}{p - p_*^{min}} f(p) = -\frac{1}{\lambda} F'(p) + \frac{\alpha_*}{\lambda (p - p_*^{min})} F(p). \quad (S13)$$

The general solution of the ordinary differential equation S13 is,

$$f(p) = \frac{c}{(p - p_*^{min})^{\delta_*}} - \frac{1}{\lambda} F(p) - \frac{\alpha_* + 1}{\lambda^2 (p - p_*^{min})^{\delta_*}} \int_p^{p_*^{max}} (p' - p_*^{min})^{\delta_* - 1} F(p') dp'.$$

We remark that  $c = 0$  because  $A_* f(p_*^{max}) = 0$  then,

$$f(p) = -\frac{1}{\lambda} F(p) - \frac{\alpha_* + 1}{\lambda^2 (p - p_*^{min})^{\delta_*}} \int_p^{p_*^{max}} (p' - p_*^{min})^{\delta_* - 1} F(p') dp'. \quad (S14)$$

In addition, we can verify that this result remains true even if  $F$  cannot be differentiated. We easily obtain the result of equation S11 from equation S14 by setting  $\lambda = 1$ , which gives  $\delta_* = 1$ , and  $F(p) = -\frac{\theta_*(p)}{\tau_*^0}$ . Then, for all  $p \in ]p_*^u, p_*^{max}]$ ,

$$\chi_*(p) = \frac{\theta_*(p)}{\tau_*^0} + \frac{\alpha_* + 1}{(p - p_*^{min})} \int_p^{p_*^{max}} \frac{\theta_*(p')}{\tau_*^0} dp'. \quad (S15)$$

From now, we consider the equation S12. In particular, we have,

$$A_* \chi_*(p) = A_*^u \chi_*(p) + (\alpha_* + 1)(p - p_*^{min})^{\alpha_*} \int_{p_*^u}^{p_*^{max}} \frac{\chi_*(p')}{(p' - p_*^{min})^{\alpha_* + 1}} dp',$$

and by using the result obtained in equation S15,

$$A_* \chi_*(p) = A_*^u \chi_*(p) + \frac{(\alpha_* + 1)(p - p_*^{min})^{\alpha_*}}{(p_*^u - p_*^{min})^{\alpha_* + 1}} \int_{p_*^u}^{p_*^{max}} \frac{\theta_*(p')}{\tau_*^0} dp',$$

then, if we define  $\gamma = \frac{\alpha_* + 1}{(p_*^u - p_*^{min})^{\alpha_* + 1}} \int_{p_*^u}^{p_*^{max}} \frac{\theta_*(p')}{\tau_*^0} dp'$ , equation S12 becomes for all  $p \in [p_*^{min}, p_*^u]$ ,

$$A_*^u \chi_*(p) - \frac{\tau_*^0 + u^0}{\tau_*^0} \chi_*(p) = -\frac{\theta_*(p)}{\tau_*^0} - (p - p_*^{min})^{\alpha_*} \gamma. \quad (S16)$$

To solve this equation, we use the same process as previously by considering a solution of  $A_*^u f - \lambda f = F$  by setting  $\lambda = \frac{\tau_*^0 + u^0}{\tau_*^0}$ , which gives  $\delta_* = \frac{\tau_*^0 - u^0}{\tau_*^0 + u^0} \alpha_* = \beta_*$ , and  $F(p) = -\frac{\theta_*(p)}{\tau_*^0} - \gamma(p - p_*^{min})^{\alpha_*}$ . We obtain for all  $p \in [p_*^{min}, p_*^u]$ ,

$$\chi_*(p) = -\frac{\tau_*^0}{\tau_*^0 + u^0} F(p) - \frac{\tau_*^{0^2} (\alpha_* + 1)}{(\tau_*^0 + u^0)^2 (p - p_*^{min})^{\beta_*}} \int_p^{p_*^u} (p' - p_*^{min})^{\beta_* - 1} F(p') dp'.$$

By replacing explicitly  $F$  by its formulation, we obtain,

$$\begin{aligned} \chi_*(p) &= \frac{\theta_*(p)}{\tau_*^0 + u^0} + \frac{\tau_*^0 (\alpha_* + 1)}{(\tau_*^0 + u^0)^2 (p - p_*^{min})^{\beta_*}} \int_p^{p_*^u} (p' - p_*^{min})^{\beta_* - 1} \theta_*(p') dp' \\ &\quad + \frac{\gamma \tau_*^0}{\tau_*^0 + u^0} (p - p_*^{min})^{\alpha_*} + \frac{\gamma \tau_*^{0^2} (\alpha_* + 1)}{(\tau_*^0 + u^0)^2 (p - p_*^{min})^{\beta_*}} \int_p^{p_*^u} (p' - p_*^{min})^{\alpha_* + \beta_* - 1} dp', \\ \chi_*(p) &= \frac{\theta_*(p)}{\tau_*^0 + u^0} + \frac{\tau_*^0 (\alpha_* + 1)}{(\tau_*^0 + u^0)^2 (p - p_*^{min})^{\beta_*}} \int_p^{p_*^u} (p' - p_*^{min})^{\beta_* - 1} \theta_*(p') dp' \\ &\quad + \frac{\gamma \tau_*^0}{\tau_*^0 + u^0} (p - p_*^{min})^{\alpha_*} + \frac{\gamma \tau_*^{0^2} (\alpha_* + 1) ((p_*^u - p_*^{min})^{\alpha_* + \beta_*} - (p - p_*^{min})^{\alpha_* + \beta_*})}{(\tau_*^0 + u^0)^2 (\alpha_* + \beta_*) (p - p_*^{min})^{\beta_*}}. \end{aligned}$$

We remark that  $\alpha_* + \beta_* = \frac{(\alpha_*+1)\tau_*^0}{\tau_*^0+u^0}$ . Then,

$$\begin{aligned}\chi_*(p) &= \frac{\theta_*(p)}{\tau_*^0+u^0} + \frac{\tau_*^0(\alpha_*+1)}{(\tau_*^0+u^0)^2(p-p_*^{min})^{\beta_*}} \int_p^{p_*^u} (p'-p_*^{min})^{\beta_*-1} \theta_*(p') dp' \\ &\quad + \frac{\gamma\tau_*^0}{\tau_*^0+u^0} (p-p_*^{min})^{\alpha_*} + \frac{\gamma\tau_*^0((p_*^u-p_*^{min})^{\alpha_*+\beta_*} - (p-p_*^{min})^{\alpha_*+\beta_*})}{(\tau_*^0+u^0)(p-p_*^{min})^{\beta_*}}, \\ \chi_*(p) &= \frac{\theta_*(p)}{\tau_*^0+u^0} + \frac{\tau_*^0(\alpha_*+1)}{(\tau_*^0+u^0)^2(p-p_*^{min})^{\beta_*}} \int_p^{p_*^u} (p'-p_*^{min})^{\beta_*-1} \theta_*(p') dp' \\ &\quad + \frac{\tau_*^0}{\tau_*^0+u^0} (p-p_*^{min})^{\alpha_*} \left( 1 + \frac{(p_*^u-p_*^{min})^{\alpha_*+\beta_*} - (p-p_*^{min})^{\alpha_*+\beta_*}}{(p-p_*^{min})^{\alpha_*+\beta_*}} \right) \gamma, \\ \chi_*(p) &= \frac{\theta_*(p)}{\tau_*^0+u^0} + \frac{\tau_*^0(\alpha_*+1)}{(\tau_*^0+u^0)^2(p-p_*^{min})^{\beta_*}} \int_p^{p_*^u} (p'-p_*^{min})^{\beta_*-1} \theta_*(p') dp' \\ &\quad + \frac{\tau_*^0}{\tau_*^0+u^0} \frac{(p_*^u-p_*^{min})^{\alpha_*+\beta_*}}{(p-p_*^{min})^{\beta_*}} \gamma.\end{aligned}$$

Finally, by replacing explicitly  $\gamma$  by its formulation, we obtain for all  $p \in [p_*^{min}, p_*^u]$ ,

$$\begin{aligned}\chi_*(p) &= \frac{\theta_*(p)}{\tau_*^0+u^0} + \frac{\tau_*^0(\alpha_*+1)}{(\tau_*^0+u^0)(p-p_*^{min})^{\beta_*}} \int_p^{p_*^u} (p'-p_*^{min})^{\beta_*-1} \frac{\theta_*(p')}{\tau_*^0+u^0} dp' \\ &\quad + (\alpha_*+1) \frac{(p_*^u-p_*^{min})^{\beta_*-1}}{(p-p_*^{min})^{\beta_*}} \int_{p_*^u}^{p_*^{max}} \frac{\theta_*(p')}{\tau_*^0+u^0} dp'.\end{aligned}\tag{S17}$$

**Carbon stocks** Based on equations S15 and S17, we can compute the amounts of C per pool and domain. The amount of carbon inaccessible to carbon uptake  $C_{*,\bar{\mathcal{D}}_u}$  is,

$$\begin{aligned}C_{*,\bar{\mathcal{D}}_u} &= \int_{p_*^u}^{p_*^{max}} \chi_*(p) dp \\ &= \frac{m^0}{\tau_*^0} \int_{p_*^u}^{p_*^{max}} \left( 1 + (\alpha_*+1) \ln \left( \frac{p-p_*^{min}}{p_*^u-p_*^{min}} \right) \right) s_*(p) dp \\ &\quad + \frac{m^0(1-e^0)}{\tau_*^0 e^0 I} \int_{p_*^u}^{p_*^{max}} \left( 1 + (\alpha_*+1) \ln \left( \frac{p-p_*^{min}}{p_*^u-p_*^{min}} \right) \right) i_*(p) dp,\end{aligned}\tag{S18}$$

and the amount of carbon accessible to carbon uptake  $C_{*,\mathcal{D}_u}$  is,

$$\begin{aligned}C_{*,\mathcal{D}_u} &= \int_{p_*^{min}}^{p_*^u} \chi_*(p) dp \\ &= \frac{m^0}{u^0} \int_{p_*^{min}}^{p_*^{max}} s_*(p) dp + \frac{m^0(1-e^0)}{u^0 e^0 I} \int_{p_*^{min}}^{p_*^{max}} i_*(p) dp.\end{aligned}\tag{S19}$$

## Supplementary References

- [1] Kaffenberger, J. T. & Schilling, J. S. Comparing lignocellulose physiochemistry after decomposition by brown rot fungi with distinct evolutionary origins. *Environmental Microbiology* **17**, 4885–4897 (2015).
- [2] Kuuskeri, J. *et al.* Time-scale dynamics of proteome and transcriptome of the white-rot fungus *phlebia radiata*: growth on spruce wood and decay effect on lignocellulose. *Biotechnology for biofuels* **9**, 1–22 (2016).
- [3] Lashermes, G., Gainvors-Claisse, A., Recous, S. & Bertrand, I. Enzymatic strategies and carbon use efficiency of a litter-decomposing fungus grown on maize leaves, stems, and roots. *Frontiers in Microbiology* **7** (2016).
- [4] Skyba, O., Douglas, C. J. & Mansfield, S. D. Syringyl-rich lignin renders poplars more resistant to degradation by wood decay fungi. *Applied and Environmental Microbiology* **79**, 2560–2571 (2013).
- [5] Zhang, J. *et al.* Localizing gene regulation reveals a staggered wood decay mechanism for the brown rot fungus *postia placenta*. *Proceedings of the National Academy of Sciences of the United States of America* **113**, 10968–10973 (2016).
- [6] Kohler, A. *et al.* Convergent losses of decay mechanisms and rapid turnover of symbiosis genes in mycorrhizal mutualists. *Nature Genetics* **47**, 410–U176 (2015).
- [7] Miyauchi, S. *et al.* Large-scale genome sequencing of mycorrhizal fungi provides insights into the early evolution of symbiotic traits. *Nature Communications* **11**, 1–17 (2020).
- [8] Nagy, L. G. *et al.* Genetic bases of fungal white rot wood decay predicted by phylogenomic analysis of correlated gene-phenotype evolution. *Molecular Biology and Evolution* **34**, 35–44 (2016).
- [9] Talbot, J. M., Martin, F., Kohler, A., Henrissat, B. & Peay, K. G. Functional guild classification predicts the enzymatic role of fungi in litter and soil biogeochemistry. *Soil Biology and Biochemistry* **88**, 441–456 (2015).
- [10] Rajala, T., Peltoniemi, M., Hantula, J., Mäkipää, R. & Pennanen, T. Rna reveals a succession of active fungi during the decay of norway spruce logs. *Fungal Ecology* **4**, 437–448 (2011).
- [11] Schneider, T. *et al.* Who is who in litter decomposition? metaproteomics reveals major microbial players and their biogeochemical functions. *Isme Journal* **6**, 1749–1762 (2012).
- [12] Snajdr, J. *et al.* Transformation of *quercus petraea* litter: successive changes in litter chemistry are reflected in differential enzyme activity and changes in the microbial community composition. *Fems Microbiology Ecology* **75**, 291–303 (2011).
- [13] Tláskal, V., Vorísková, J. & Baldrian, P. Bacterial succession on decomposing leaf litter exhibits a specific occurrence pattern of cellulolytic taxa and potential decomposers of fungal mycelia. *Fems Microbiology Ecology* **92** (2016).
- [14] Kallenbach, C. M., Frey, S. D. & Grandy, A. S. Direct evidence for microbial-derived soil organic matter formation and its ecophysiological controls. *Nature Communications* **7** (2016).
- [15] Kohl, L. *et al.* The origin of soil organic matter controls its composition and bioreactivity across a mesic boreal forest latitudinal gradient. *Global Change Biology* **24**, E458–E473 (2018).
- [16] Vancampenhout, K. *et al.* Differences in chemical composition of soil organic matter in natural ecosystems from different climatic regions—a pyrolysis–gc/ms study. *Soil Biology and Biochemistry* **41**, 568–579 (2009).
